# Supplementary material for: Deciphering Learning Motivation in Open Distance Learning towards Sustainable Medical Education
Source: MDPI journal article supplement (doi:10.3390/su14084497), 2022-04-10
Supplement: s1 [file s1]

# Impact of Digital Learning on Learning Motivation among Medical Students of Universiti Kebangsaan Malaysia (UKM) During COVID-19.

As a medical student, you are invited to participate in a research study. Before participating in this study, it is important that you take time to read and understand the information in this Information Sheet.

## Purpose of Study

The objectives of this study are:

1. To study the preferred sources of digital learning of medical students of UKM before and during COVID-19 pandemic period.
2. To investigate the effect of digital learning on learning motivation among UKM before and during COVID-19 pandemic period.
3. To determine the difference in learning motivation among UKM before and during COVID-19 pandemic period.

## What will the study involve?

Participants will be required to fill in some information and answer the attached questionnaire. You should reflect on yourself and your own feeling while answering the questionnaire. Hence, please answer the questionnaire honestly.

## Risks and Benefits

The risks of this study is minimal. There will be no direct benefit for you for your participation in this research. However, your participation in this research will help us to reach the research objectives and eventually help us to improve learning motivation among medical students through digital learning.

## Do you have to take part?

Participation in this research is voluntary. If you agree to take part, you are required to sign the "Informed Consent Form". You will be given a copy of the form and this information sheet.

Should you decide to participate, you still can withdraw from the study without any penalty. Your data will not be used and will be discarded. The researcher may also remove you from the study due to various reasons.

## Data and Confidentiality

The data from this study will be made into a research paper which may be published. Only the research team is allowed to access the data. The data will be reported in a collective manner with no reference to any individual. Hence, your identity will be kept confidential.

## Who can I asked about the study?

If you need further clarification, please do not hesitate to contact the under sign. Thank you.

Lee

---

LEE JUN XIN

4th Year Medical Student

National University of Malaysia (UKM)

Mobile: +6012-7241831

Email: junxin026@gmail.com

\* Required

Informed  
Consent

Research Title: Impact of Digital Learning on Learning Motivation among Medical Students of Universiti Kebangsaan Malaysia (UKM) during COVID-19

Researchers' Name: LEE JUN XIN, AHMAD HATHIM BIN AHMAD AZMAN, NG JING YI

I have read the information in the Information Sheet including information regarding the risk in this study. I have been given time to think about it and all of my questions have been answered to my satisfaction. I understand that I may freely choose to withdraw from this study at anytime without reason and without repercussion. I understand that my anonymity will be ensured in the write-up.

I voluntarily agree to be part of this research study, to follow the study procedures, and to provide necessary information to the doctor, nurses, or other staff members, as requested.

Demography

1. Age \*

---

2. Year of Study \*

*Mark only one oval.*

☐ 1

☐ 2

☐ 3

☐ 4

☐ 5

## 3. Phase of study \*

*Mark only one oval.*

☐ Preclinical

☐ Clinical

## 4. Have you ever repeated a year in medical school? \*

*Mark only one oval.*

☐ Yes

☐ No

### Digital Learning Usage

## 5. Do you use digital learning in your studies for medical education throughout this COVID-19 pandemic period? \*

*Mark only one oval.*

☐ Yes

☐ No      *Skip to question 8*

### Digital Learning Usage During COVID-19

6. Rank the following digital sources for medical education by preference (1 is your first choice, 7 is your least choice, please arrange accordingly.) \*Each number can only be chosen once. \*

Mark only one oval per row.

|                          | 1                     | 2                     | 3                     | 4                     | 5                     | 6                     | 7                     |
|--------------------------|-----------------------|-----------------------|-----------------------|-----------------------|-----------------------|-----------------------|-----------------------|
| Videos                   | <input type="radio"/> |
| Online research articles | <input type="radio"/> |
| E-Books                  | <input type="radio"/> |
| Games                    | <input type="radio"/> |
| Audiotapes               | <input type="radio"/> |
| Online course            | <input type="radio"/> |
| Simulation software      | <input type="radio"/> |

7. Please choose ONE (1) based on your usage of digital sources for medical education during the pandemic \*

Mark only one oval.

- ☐ Less than once a week
- ☐ 1 to 2 times per week
- ☐ 3 to 4 times per week
- ☐ More than 5 times per week

#### A. Self- Efficacy

Please answer all questions.

- 1 - Strongly Disagree  
 2 - Disagree  
 3 - No Opinion  
 4 - Agree  
 5 - Strongly Agree

8. Whether the medical content is difficult or easy, I am sure that I can understand it. \*

Mark only one oval.

| 1                     | 2                     | 3                     | 4                     | 5                     |
|-----------------------|-----------------------|-----------------------|-----------------------|-----------------------|
| <input type="radio"/> |

9. I tried to avoid understanding difficult medical concepts. \*

Mark only one oval.

| 1                     | 2                     | 3                     | 4                     | 5                     |
|-----------------------|-----------------------|-----------------------|-----------------------|-----------------------|
| <input type="radio"/> |

10. I am sure that I can do well on medical tests. \*

Mark only one oval.

| 1                     | 2                     | 3                     | 4                     | 5                     |
|-----------------------|-----------------------|-----------------------|-----------------------|-----------------------|
| <input type="radio"/> |

11. Even if I put in a lot of effort, I am unable to learn medicine. \*

Mark only one oval.

| 1                     | 2                     | 3                     | 4                     | 5                     |
|-----------------------|-----------------------|-----------------------|-----------------------|-----------------------|
| <input type="radio"/> |

12. When medical activities are too difficult, I give up or only do the easy parts. \*

Mark only one oval.

| 1                     | 2                     | 3                     | 4                     | 5                     |
|-----------------------|-----------------------|-----------------------|-----------------------|-----------------------|
| <input type="radio"/> |

13. During medical activities I prefer to ask other people for the answer rather than think by myself. \*

Mark only one oval.

| 1                     | 2                     | 3                     | 4                     | 5                     |
|-----------------------|-----------------------|-----------------------|-----------------------|-----------------------|
| <input type="radio"/> |

14. When I find the medical content difficult, I stop trying to learn it. \*

Mark only one oval.

| 1                     | 2                     | 3                     | 4                     | 5                     |
|-----------------------|-----------------------|-----------------------|-----------------------|-----------------------|
| <input type="radio"/> |

## B. Active Learning Strategies

Please answer all questions.  
1 - Strongly Disagree  
2 - Disagree  
3 - No Opinion  
4 - Agree  
5 - Strongly Agree

15. When learning new medical concepts, I attempt to understand them myself. \*

Mark only one oval.

| 1                     | 2                     | 3                     | 4                     | 5                     |
|-----------------------|-----------------------|-----------------------|-----------------------|-----------------------|
| <input type="radio"/> |

16. When learning new medical concepts, I connect them to my previous experiences. \*

Mark only one oval.

| 1                     | 2                     | 3                     | 4                     | 5                     |
|-----------------------|-----------------------|-----------------------|-----------------------|-----------------------|
| <input type="radio"/> |

17. When I fail to understand a medical concept, I find relevant resources that will help me. \*

Mark only one oval.

| 1                     | 2                     | 3                     | 4                     | 5                     |
|-----------------------|-----------------------|-----------------------|-----------------------|-----------------------|
| <input type="radio"/> |

18. When I fail to understand a medical concept, I would discuss with the lecturer or with other students through online platform to clarify my understanding. \*

Mark only one oval.

| 1                     | 2                     | 3                     | 4                     | 5                     |
|-----------------------|-----------------------|-----------------------|-----------------------|-----------------------|
| <input type="radio"/> |

19. During the learning processes, I attempt to make connections between the concepts I learn. \*

Mark only one oval.

| 1                     | 2                     | 3                     | 4                     | 5                     |
|-----------------------|-----------------------|-----------------------|-----------------------|-----------------------|
| <input type="radio"/> |

20. When I make a mistake, I try to find out why. \*

Mark only one oval.

| 1                     | 2                     | 3                     | 4                     | 5                     |
|-----------------------|-----------------------|-----------------------|-----------------------|-----------------------|
| <input type="radio"/> |

21. When I find any medical concepts that I am unable to understand, I still try to learn them. \*

Mark only one oval.

| 1                     | 2                     | 3                     | 4                     | 5                     |
|-----------------------|-----------------------|-----------------------|-----------------------|-----------------------|
| <input type="radio"/> |

22. When new medical concepts that I have learned conflict with my previous understanding, I try to understand why. \*

Mark only one oval.

| 1                     | 2                     | 3                     | 4                     | 5                     |
|-----------------------|-----------------------|-----------------------|-----------------------|-----------------------|
| <input type="radio"/> |

### C. Medical Learning View

Please answer all questions.

1 - Strongly Disagree

2 - Disagree

3 - No Opinion

4 - Agree

5 - Strongly Agree



23. I think that learning medicine is important because I can use it in my daily life. \*

Mark only one oval.

| 1                     | 2                     | 3                     | 4                     | 5                     |
|-----------------------|-----------------------|-----------------------|-----------------------|-----------------------|
| <input type="radio"/> |

24. I think that learning medicine is important because it stimulates my thinking. \*

Mark only one oval.

| 1                     | 2                     | 3                     | 4                     | 5                     |
|-----------------------|-----------------------|-----------------------|-----------------------|-----------------------|
| <input type="radio"/> |

25. In medicine, I think that it is important to learn to solve problems. \*

Mark only one oval.

| 1                     | 2                     | 3                     | 4                     | 5                     |
|-----------------------|-----------------------|-----------------------|-----------------------|-----------------------|
| <input type="radio"/> |

26. In learning medicine online, I think it is important to participate in inquiry activities \*

Mark only one oval.

| 1                     | 2                     | 3                     | 4                     | 5                     |
|-----------------------|-----------------------|-----------------------|-----------------------|-----------------------|
| <input type="radio"/> |

27. It is important to have the opportunity to satisfy my own curiosity when learning medicine online \*

Mark only one oval.

| 1                     | 2                     | 3                     | 4                     | 5                     |
|-----------------------|-----------------------|-----------------------|-----------------------|-----------------------|
| <input type="radio"/> |

#### D. Performance Goal

Please answer all questions.

1 - Strongly Disagree

2 - Disagree

3 - No Opinion

4 - Agree

5 - Strongly Agree

28. I participate in medical courses to get a good grade. \*

Mark only one oval.

| 1                     | 2                     | 3                     | 4                     | 5                     |
|-----------------------|-----------------------|-----------------------|-----------------------|-----------------------|
| <input type="radio"/> |

29. I participate in medical courses to perform better than other students. \*

Mark only one oval.

| 1                     | 2                     | 3                     | 4                     | 5                     |
|-----------------------|-----------------------|-----------------------|-----------------------|-----------------------|
| <input type="radio"/> |

30. I participate in medical courses so that other students think that I'm smart. \*

Mark only one oval.

| 1                     | 2                     | 3                     | 4                     | 5                     |
|-----------------------|-----------------------|-----------------------|-----------------------|-----------------------|
| <input type="radio"/> |

31. I participate in medical courses so that the lecturer pays attention to me. \*

Mark only one oval.

| 1                     | 2                     | 3                     | 4                     | 5                     |
|-----------------------|-----------------------|-----------------------|-----------------------|-----------------------|
| <input type="radio"/> |

### E. Achievement Goal

Please answer all questions.

1 - Strongly Disagree

2 - Disagree

3 - No Opinion

4 - Agree

5 - Strongly Agree

32. During a medical course, I feel most fulfilled when I attain a good score in a test.

\*

Mark only one oval.

| 1                     | 2                     | 3                     | 4                     | 5                     |
|-----------------------|-----------------------|-----------------------|-----------------------|-----------------------|
| <input type="radio"/> |

33. I feel most fulfilled when I feel confident about the content in a medical course.

\*

Mark only one oval.

| 1                     | 2                     | 3                     | 4                     | 5                     |
|-----------------------|-----------------------|-----------------------|-----------------------|-----------------------|
| <input type="radio"/> |

34. During a medical course, I feel most fulfilled when I am to solve a difficult problem. \*

Mark only one oval.

| 1                     | 2                     | 3                     | 4                     | 5                     |
|-----------------------|-----------------------|-----------------------|-----------------------|-----------------------|
| <input type="radio"/> |

35. During a medical course, I feel most fulfilled when the lecturer accepts my ideas. \*

Mark only one oval.

| 1                     | 2                     | 3                     | 4                     | 5                     |
|-----------------------|-----------------------|-----------------------|-----------------------|-----------------------|
| <input type="radio"/> |

36. During a medical course, I feel most fulfilled when other students accept my ideas. \*

Mark only one oval.

| 1                     | 2                     | 3                     | 4                     | 5                     |
|-----------------------|-----------------------|-----------------------|-----------------------|-----------------------|
| <input type="radio"/> |

## F. Learning Environment Stimulation

Please answer all questions.

1 - Strongly Disagree

2 - Disagree

3 - No Opinion

4 - Agree

5 - Strongly Agree

37. I am willing to participate in this medical course online because the content is exciting and changeable. \*

Mark only one oval.

| 1                     | 2                     | 3                     | 4                     | 5                     |
|-----------------------|-----------------------|-----------------------|-----------------------|-----------------------|
| <input type="radio"/> |

38. I am willing to participate in this medical course online because the lecturer uses a variety of lecture methods. \*

Mark only one oval.

| 1                     | 2                     | 3                     | 4                     | 5                     |
|-----------------------|-----------------------|-----------------------|-----------------------|-----------------------|
| <input type="radio"/> |

39. I am willing to participate in this medical course online because the lecturer is lenient on me. \*

Mark only one oval.

| 1                     | 2                     | 3                     | 4                     | 5                     |
|-----------------------|-----------------------|-----------------------|-----------------------|-----------------------|
| <input type="radio"/> |

40. I am willing to participate in this medical course online because the lecturer pays attention to me. \*

Mark only one oval.

| 1                     | 2                     | 3                     | 4                     | 5                     |
|-----------------------|-----------------------|-----------------------|-----------------------|-----------------------|
| <input type="radio"/> |

41. I am willing to participate in this medical course online because it is challenging. \*

Mark only one oval.

| 1                     | 2                     | 3                     | 4                     | 5                     |
|-----------------------|-----------------------|-----------------------|-----------------------|-----------------------|
| <input type="radio"/> |

42. I am willing to participate in this medical course online because the students are involved in discussions. \*

Mark only one oval.

| 1                     | 2                     | 3                     | 4                     | 5                     |
|-----------------------|-----------------------|-----------------------|-----------------------|-----------------------|
| <input type="radio"/> |

43. How do you cope with your learning motivation during this COVID-19 period? \*

---

---

---

---

---

44. In your opinion, how can we improve digital learning in medical education? \*

---

---

---

---

---

# Google Forms
